# Supplementary material for: Systemic Chemotherapy in Colorectal Peritoneal Metastases Treated with Cytoreductive Surgery: Systematic Review and Meta-Analysis
Source: MDPI journal article supplement (doi:10.3390/cancers16061182), 2024-03-18
Supplement: s1 [file s1]

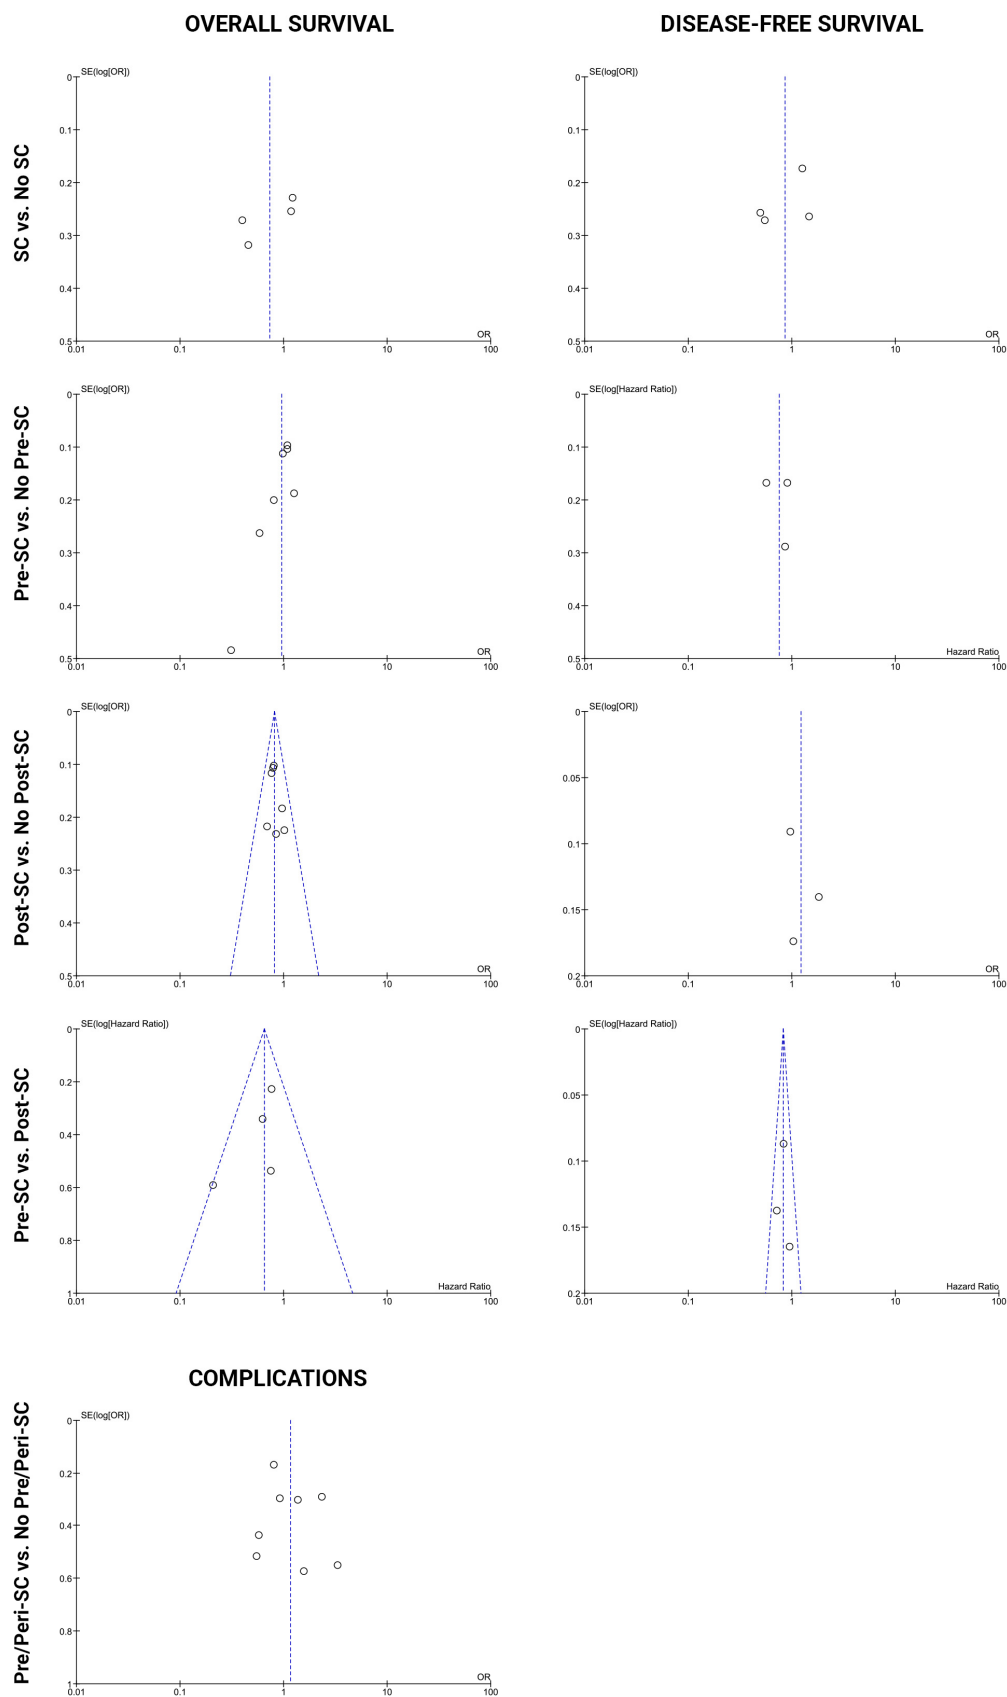

**Figure S1.** Funnel plots of the performed analyses.

**Table S1.** Studies excluded after full-text evaluation.

| First Author, Year | Study design (centers n)                    | Study period | Country                 | Reason for exclusion |
|--------------------|---------------------------------------------|--------------|-------------------------|----------------------|
| Shen, 2004         | retrospective single center                 | 1991-2002    | USA                     | CC2 = 52%            |
| Chua, 2011         | retrospective multicentric (3)              | 1988-2009    | Germany, Australia, USA | CC2 = 73%            |
| Adachi, 2015       | retrospective single center                 | 1992-2012    | Japan                   | CC2 = 70%            |
| Glockzin, 2018     | prospective multicenter (10)                | 2010-2014    | Germany                 | CC2 = 38%            |
| Leimnkuhler, 2019  | retrospective and prospective single center | 2006-2015    | Netherlands             | CC2 = 33%            |
| Zhou, 2021         | retrospective multicentric (2)              | 2017-2019    | China                   | CC2 = 40%            |

**Table S2.** Newcastle-Ottawa Scale (NOS) for assessing the quality of studies in meta-analyses.

|        |                | COHORT STUDY |    |    |    |   |    |    |    |       |   |   |   | CASE CONTROL STUDY |    |    |      |    |   |    |    |       |   |   |      |         |  |  |  |   |   |   |      |
|--------|----------------|--------------|----|----|----|---|----|----|----|-------|---|---|---|--------------------|----|----|------|----|---|----|----|-------|---|---|------|---------|--|--|--|---|---|---|------|
|        |                | S1           | S2 | S3 | S4 | C | O1 | O2 | O3 | Total | S | C | O | Quality            | S1 | S2 | S3   | S4 | C | E1 | E2 | Total | S | C | E    | Quality |  |  |  |   |   |   |      |
| 1      | Glehen, 2004   | 1            | 1  | 1  | 1  | 1 | 1  | 1  |    | 7     | 4 | 1 | 2 | Good               |    |    |      |    |   |    |    |       |   |   |      |         |  |  |  |   |   |   |      |
| 2      | Elias, 2010    | 1            | 1  | 1  | 1  | 1 | 1  | 1  |    | 7     | 4 | 1 | 2 | Good               |    |    |      |    |   |    |    |       |   |   |      |         |  |  |  |   |   |   |      |
| 3      | Passot, 2012   | 1            | 1  | 1  | 1  | 1 | 1  | 1  |    | 7     | 4 | 1 | 2 | Good               |    |    |      |    |   |    |    |       |   |   |      |         |  |  |  |   |   |   |      |
| 4      | Baratti, 2014  | 1            | 1  | 1  | 1  | 1 | 1  | 1  |    | 7     | 4 | 1 | 2 | Good               |    |    |      |    |   |    |    |       |   |   |      |         |  |  |  |   |   |   |      |
| 5      | Ceelen, 2014   | 1            | 1  | 1  | 1  | 1 | 1  | 1  |    | 7     | 4 | 1 | 2 | Good               |    |    |      |    |   |    |    |       |   |   |      |         |  |  |  |   |   |   |      |
| 6      | Kuijpers, 2014 | 1            | 1  | 1  | 1  |   | 1  | 1  |    | 6     | 4 | 0 | 2 | Fair               |    |    |      |    |   |    |    |       |   |   |      |         |  |  |  |   |   |   |      |
| 7      | Devilee, 2016  | 1            | 1  | 1  | 1  | 1 | 1  | 1  |    | 7     | 4 | 1 | 2 | Good               |    |    |      |    |   |    |    |       |   |   |      |         |  |  |  |   |   |   |      |
| 8      | Maillet, 2016  | 1            | 1  | 1  | 1  | 1 | 1  | 1  |    | 7     | 4 | 1 | 2 | Good               |    |    |      |    |   |    |    |       |   |   |      |         |  |  |  |   |   |   |      |
| 9      | van Eden, 2017 | 1            | 1  | 1  | 1  | 1 | 1  | 1  |    | 7     | 4 | 1 | 2 | Good               |    |    |      |    |   |    |    |       |   |   |      |         |  |  |  |   |   |   |      |
| 10     | Beal, 2020     | 1            | 1  | 1  | 1  | 1 | 1  | 1  |    | 7     | 4 | 1 | 2 | Good               |    |    |      |    |   |    |    |       |   |   |      |         |  |  |  |   |   |   |      |
| 11     | Repullo, 2021  |              |    | 1  | 1  | 1 | 1  | 1  |    | 5     | 2 | 1 | 2 | Fair               |    |    |      |    |   |    |    |       |   |   |      |         |  |  |  |   |   |   |      |
| 12     | Rovers, 2021   |              |    |    |    |   |    |    |    |       |   |   |   | 1                  | 1  | 1  | 1    | 2  | 1 | 1  | 8  | 4     | 2 | 2 | Good |         |  |  |  |   |   |   |      |
| 13     | Hanna, 2022    | 1            | 1  | 1  | 1  | 1 | 1  | 1  |    | 7     | 4 | 1 | 2 | Good               |    |    |      |    |   |    |    |       |   |   |      |         |  |  |  |   |   |   |      |
| 14     | Cashin, 2023   |              |    |    |    |   |    |    |    |       |   |   |   | 1                  | 1  | 1  | 1    | 2  | 1 | 1  | 8  | 4     | 2 | 2 | Good |         |  |  |  |   |   |   |      |
| 15     | Tonello, 2023  |              |    |    |    |   |    |    |    |       |   |   |   | 1                  | 1  | 1  | 1    | 2  | 1 | 1  | 8  | 4     | 2 | 2 | Good |         |  |  |  |   |   |   |      |
| Median |                | 7            |    |    |    |   |    |    |    |       |   |   |   | 4                  | 1  | 2  | Good | 8  |   |    |    |       |   |   |      |         |  |  |  | 4 | 2 | 2 | Good |

**Good:** 3-4 S and 1-2 C and 2-3 O/E.

**Fair:** 2 S and 1-2 C and 2-3 O/E.

**Poor:** 0-1 S or 0 C or 1 O/E.

*Abbreviations.* S: Selection; C: Comparability; O: Outcome; E: Exposure.

**Table S3.** Meta-regression results for severe complications sub-analysis.

|                                                              | Period | Design | Target therapy | Triplet SC |
|--------------------------------------------------------------|--------|--------|----------------|------------|
| <b>Baratti, 2014</b>                                         | N      | N      | N              | N          |
| <b>Devilee, 2016</b>                                         | N      | N      | N              | N          |
| <b>van Eden, 2017</b>                                        | N      | N      | -              | N          |
| <b>Beal, 2020</b>                                            | N      | N      | Y              | Y          |
| <b>Repullo, 2021</b>                                         | Y      | Y      | Y              | N          |
| <b>Rovers, 2021</b>                                          | Y      | N      | Y              | N          |
| <b>Cashin, 2023</b>                                          | Y      | Y      | -              | -          |
| <b>Tonello, 2023</b>                                         | Y      | Y      | Y              | Y          |
| <b>Residual heterogeneity (I<sup>2</sup>)</b>                | 65.9%  | 68.3%  | 65.0%          | 49.4%      |
| <b>Amount of heterogeneity accounted for (R<sup>2</sup>)</b> | 0%     | 0%     | 0%             | 29.8%      |
| <b>p-value</b>                                               | 0.316  | 0.774  | 0.251          | 0.196      |

**Period:** studies with median year of patient enrollment after 2009 (year of all included studies).

**Design:** studies with a design with low-risk of bias (Yes: randomized controlled trials or propensity-score studies) compared to high-risk (No: retrospective series).

**Target therapy:** studies using target therapy in at least 50% of patients.

**Triplet:** studies using triplet systemic chemotherapy (FOLFOXIRI).

Y: yes, N: no.
